# Supplementary material
Source: PubMed Central journal article supplement (PMC4097639)
Supplement: IAI.01706-14_zii999090753so1.pdf [file IAI.01706-14_zii999090753so1.pdf]

## A

| Construct Name          | Primer Pair                 | Restriction Enzyme | Template              |
|-------------------------|-----------------------------|--------------------|-----------------------|
| 1:WT                    | T6WT Fwd x T6WT Rev         | (BamHI/HindIII)    | MGAS10394 genomic DNA |
| 2:WT minus extension    | T6noExt Fwd x T6noExt Rev   | (BamHI/HindIII)    | 1:WT T6               |
| 3:N and M domains       | T6Ndom Fwd x T6Mdom Rev     | (KasI/XhoI)        | 1:WT T6               |
| 4:M                     | T6Mdom Fwd x T6Mdom Rev     | (KasI/XhoI)        | 1:WT T6               |
| 5:M and C domains + ext | T6Mdom Fwd x T6Cdom Rev     | (KasI/XhoI)        | 1:WT T6               |
| 6:M and C domains - ext | T6Mdom Fwd x T6Cdom Rev     | (KasI/XhoI)        | 5:WT minus extension  |
| 7:M1                    | M1_0128 Fwd x M1_0128 Rev   | (BamHI/EcoRI)      | SF370 genomic DNA     |
| 8:M2                    | M2_0109 Fwd x M2_0109 Rev   | (BamHI/HindIII)    | MGAS10270 genomic DNA |
| 9:M4                    | M4_0116 Fwd x M4_0116 Rev   | (BamHI/EcoRI)      | MGAS10750 genomic DNA |
| 10:M28                  | M28_0109 Fwd x M28_0109 Rev | (BamHI/EcoRI)      | MGAS6180 genomic DNA  |
| 11:M49                  | M49_FctA Fwd x M49_FctA Rev | (BamHI/EcoRI)      | 94/229* genomic DNA   |

## B

| Primer Name  | Primer Sequence                             |
|--------------|---------------------------------------------|
| T6WT Fwd     | <u>cgggatcctt</u> atcaaaagatgatactgcacaac   |
| T6WT Rev     | cgaagcttttatccacctgtcgaaggaattcacc          |
| T6Ndom Fwd   | <u>gtaaaggcgcc</u> aaagatgatactgcacaactaaag |
| T6Mdom Fwd   | <u>gtaaaggcgccc</u> atctattacaaagaaagtaacc  |
| T6Mdom Rev   | gtaaactcgcagttaataagtataaacaattttagaatcttc  |
| T6Cdom Rev   | gtaaactcgcagttatagcttggttagggatgtcag        |
| T6noExt Fwd  | Ⓣ-ggaggttcaggtacagtattattag                 |
| T6noExt Rev  | Ⓣ-ccaatctgcccgaatctcataag                   |
| M1_0128 Fwd  | <u>cgggatccc</u> gtacaacagttcacgg           |
| M1_0128 Rev  | cggaattcttattcaagacttttttatttg              |
| M2_0109 Fwd  | <u>cgggatccg</u> aggacaccagagtgcttctc       |
| M2_0109 Rev  | cgaagcttttaaccaccagattagggattgaagg          |
| M4_0116 Fwd  | <u>gcggatccg</u> aatcatcacataaaaccgatg      |
| M4_0116 Rev  | cggaattcttaaccaccagttgaggatgg               |
| M28_0109 Fwd | <u>gcggtatccg</u> agacggcaggagtgccgaaaatg   |
| M28_0109 Rev | cggaattcttaaacaccagttggaacttgagtg           |
| M49_FctA Fwd | <u>ctagggatccg</u> agacagcaggagtgattg       |
| M49_FctA Rev | cggaattcttaaacaccagttggaacttgagtg           |

**TABLE S1**

(A) Construct details of the clones used in this work. (B) Primer sequences are shown with the gene specific sequence as Black text and the non-gene specific sequence as Grey text with the restriction site underlined. Ⓣ- 5' phosphate group. \* Proft *et al.* (2000) (1).

1. **Proft T, Moffatt SL, Weller KD, Paterson A, Martin D, Fraser JD. 2000.** The streptococcal superantigen SMEZ exhibits wide allelic variation, mosaic structure, and significant antigenic variation. *J Exp Med* **191**:1765-1776.
