# Supplementary material
Source: PubMed Central journal article supplement (PMC4097639)
Supplement: IAI.01706-14_zii999090753so2.pdf [file IAI.01706-14_zii999090753so2.pdf]

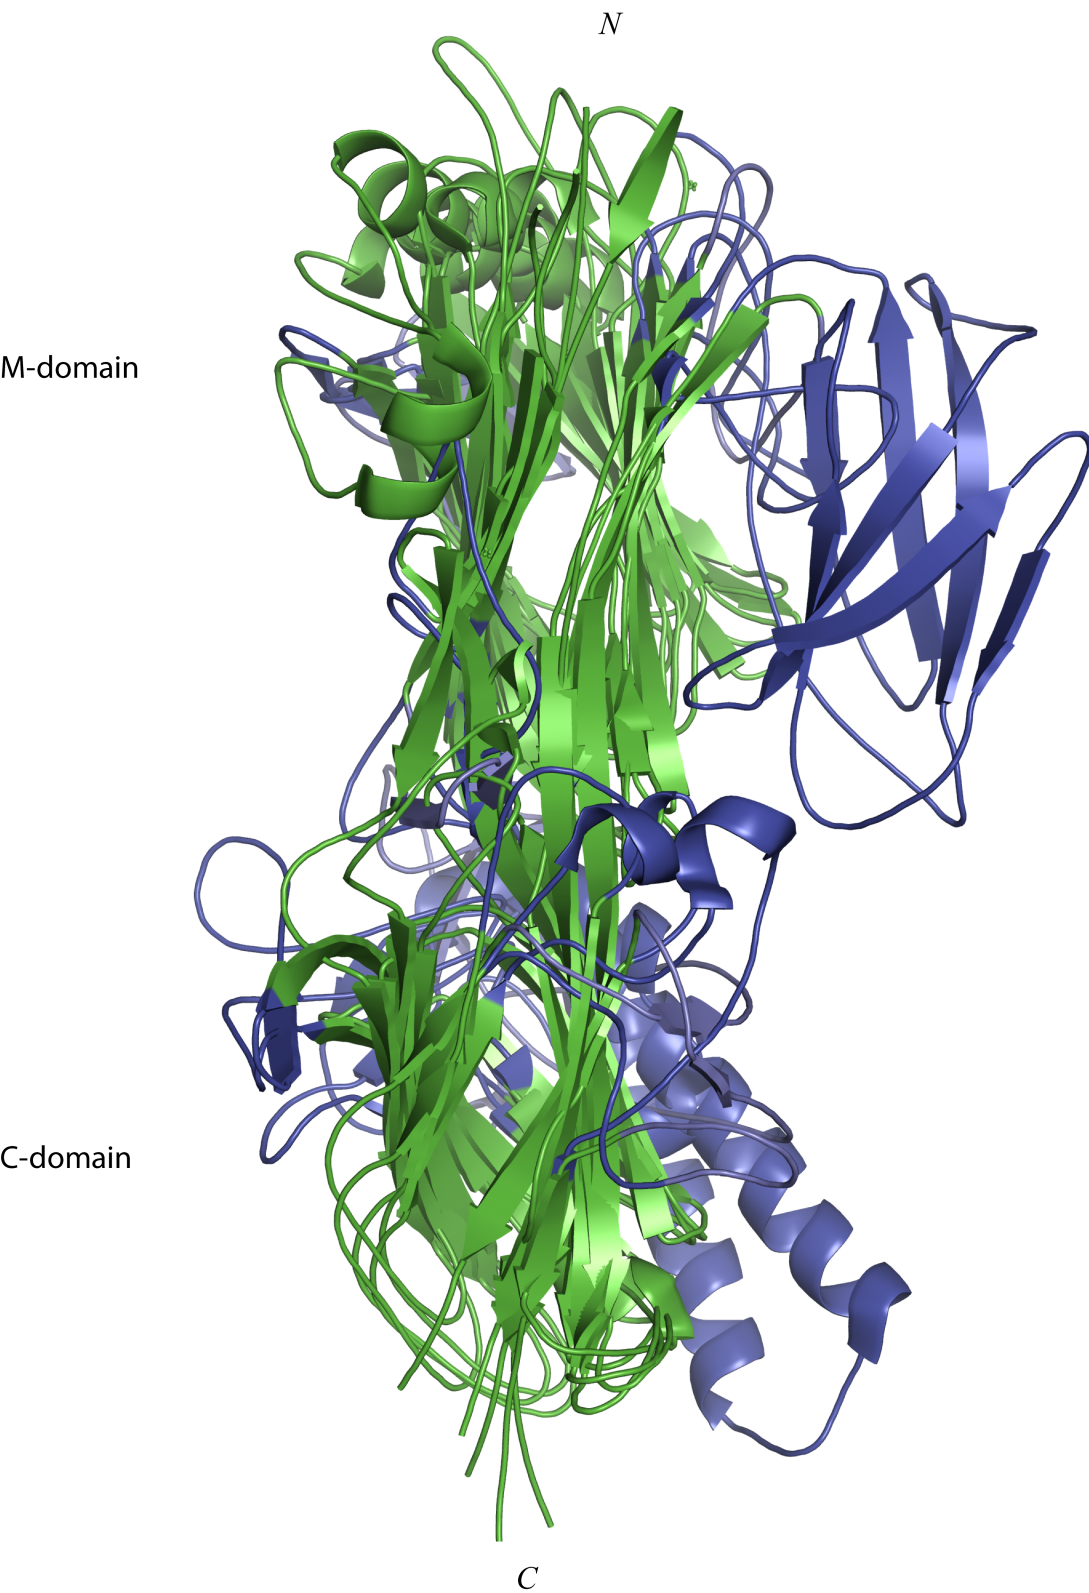

**FIG S1** Structural alignment of Gram-positive backbone pilins highlights the conserved M-C domain core (Green) from T6 (*S. pyogenes*), RrgB (*S. pneumoniae*), SpaA (*C. diphtheriae*), FimP (*A. oris*) and GBS80 (*S. agalactiae*). The core Ig-like fold of the CnaA M-domain and a CnaB C-domain is decorated at conserved positions with extensions or variable regions (Blue). N = N-terminus. C = C-terminus.
